# Supplementary material
Source: MDPI journal article supplement (https://www.mdpi.com/2410-3888/8/10/482)
Supplement: s1 [file s1]

# ***In Silico* Chromosome Mapping of the Male-Specific/Linked Loci in the Jade Perch (*Scortum barcoo*) Suggests Chromosome 19 as the Putative Y Sex Chromosome**

Thitipong Panthum <sup>1,2,3</sup>, Pish Wattanadilokchatkun <sup>1</sup>, Kitipong Jaisamut <sup>1</sup>, Worapong Singchat <sup>1,3</sup>, Syed Farhan Ahmad <sup>1,2,3</sup>, Narongrit Muangmai <sup>1,4</sup>, Prateep Duengkae <sup>1,3</sup>, Agostinho Antunes <sup>5,6</sup> and Korsorn Srikulnath <sup>1,2,3,7,8,\*</sup>

- <sup>1</sup> Animal Genomics and Bioresource Research Unit (AGB Research Unit), Faculty of Science, Kasetsart University, 50 Ngamwongwan, Bangkok 10900, Thailand; thitipong.pa@ku.th (T.P.); pish.wa@ku.th (P.W.); worapong.si@ku.th (W.P.); syedfarhan.a@ku.th (S.F.A.); ffsnrm@ku.ac.th (N.M.); fforptd@ku.ac.th (P.D.); aantunes@ciimar.up.pt (A.A.); fscisrp@ku.ac.th (K.S.)
  - <sup>2</sup> Interdisciplinary Graduate Program in Bioscience, Faculty of Science, Kasetsart University, Bangkok 10900, Thailand; thitipong.pa@ku.th (T.P.); syedfarhan.a@ku.th (S.F.A.); fscisrp@ku.ac.th (K.S.)
  - <sup>3</sup> Special Research Unit for Wildlife Genomics (SRUWG), Department of Forest Biology, Faculty of Forestry, Kasetsart University, 50 Ngamwongwan, Bangkok 10900, Thailand; thitipong.pa@ku.th (T.P.); worapong.si@ku.th (W.P.); syedfarhan.a@ku.th (S.F.A.); prateepd@hotmail.com (P.D.); fscisrp@ku.ac.th (K.S.)
  - <sup>4</sup> Department of Fishery Biology, Faculty of Fisheries, Kasetsart University, 50 Ngamwongwan, Bangkok 10900, Thailand; ffsnrm@ku.ac.th (N.M.)
  - <sup>5</sup> CIIMAR/CIMAR, Interdisciplinary Centre of Marine and Environmental Research, University of Porto, Terminal de Cruzeiros do Porto de Leixões, Av. General Norton de Matos, s/n, 4450-208 Porto, Portugal; aantunes@ciimar.up.pt (A.A.)
  - <sup>6</sup> Department of Biology, Faculty of Sciences, University of Porto, Rua do Campo Alegre, 4169-007, Porto, Portugal; aantunes@ciimar.up.pt (A.A.)
  - <sup>7</sup> Center of Excellence on Agricultural Biotechnology (AG-BIO/PERDO-CHE), Bangkok 10900, Thailand; fscisrp@ku.ac.th (K.S.)
  - <sup>8</sup> Center for Advanced Studies in Tropical Natural Resources, National Research University-Kasetsart University, Kasetsart University, Bangkok 10900, Thailand; fscisrp@ku.ac.th (K.S.)
- \* Correspondence: ornsorn.s@ku.ac.th; Tel.: +66-25625444

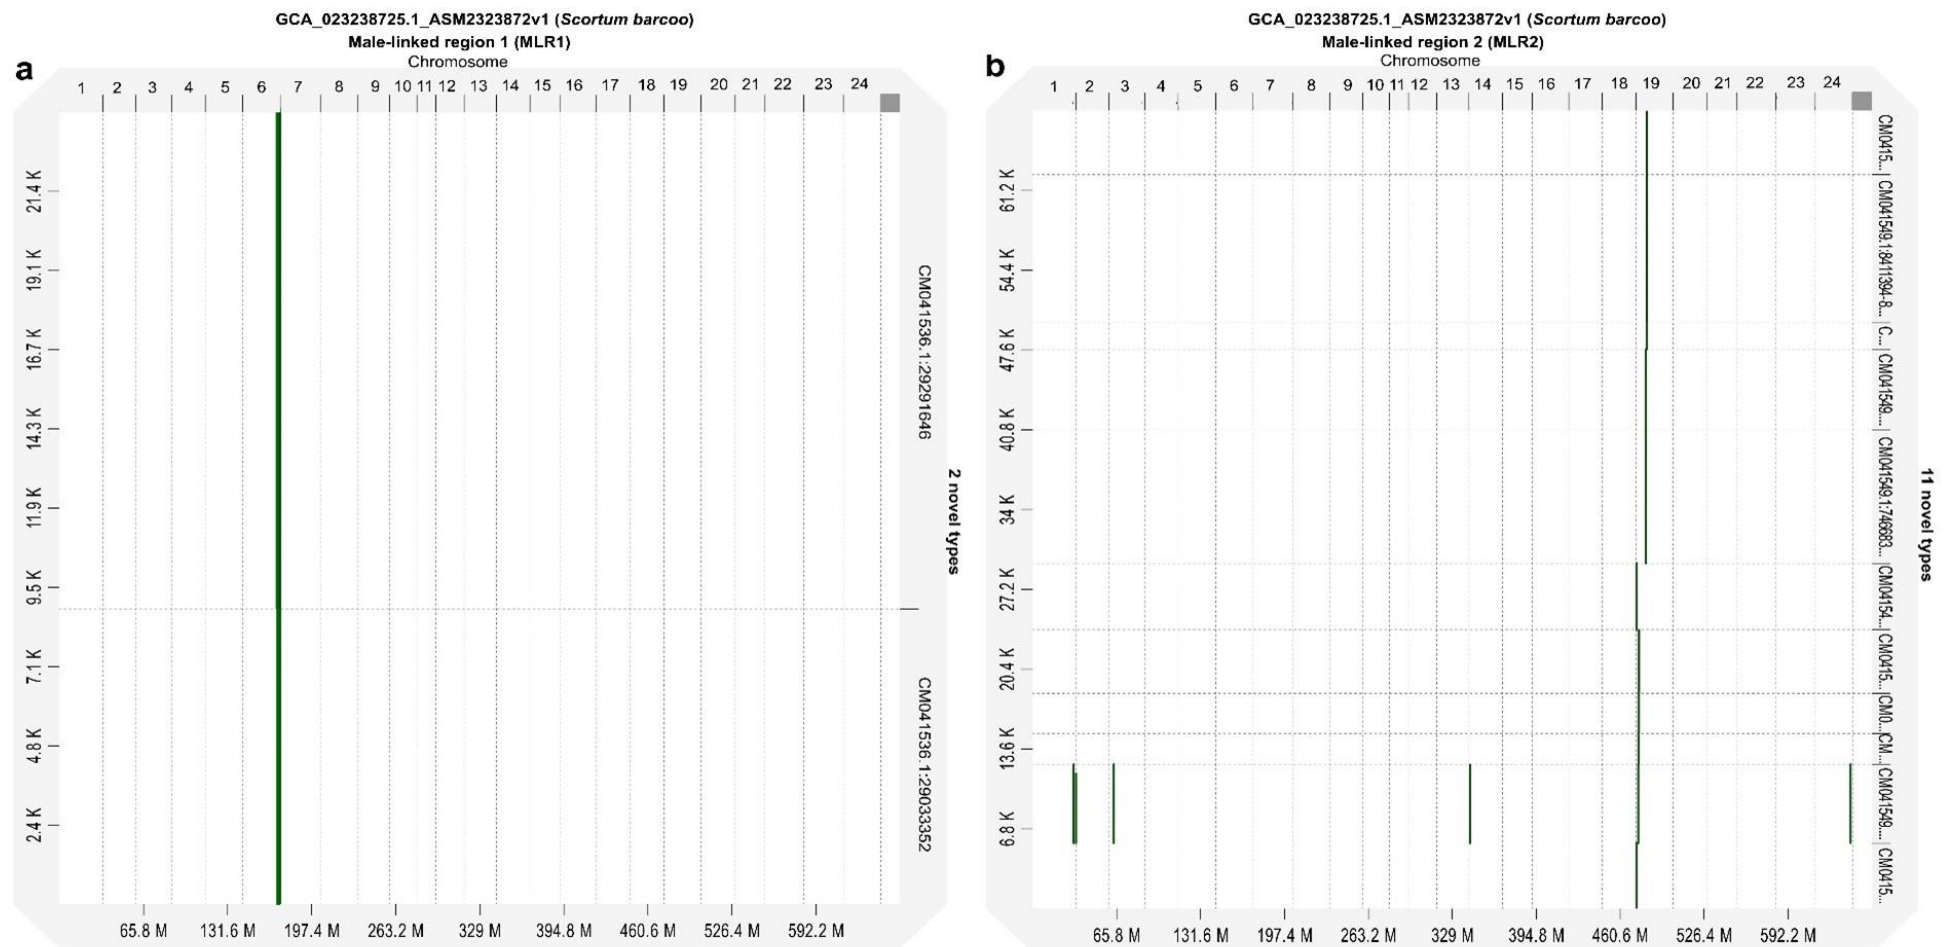

**Figure S1.** (a) The 2 novel repetitive element types from the MLR1 were located on chromosome 6 of jade perch (*Scortum barcoo* (McCulloch and Waite, 1917)). (b) The 11 novel repetitive element types from the MLR2 were predominantly located on chromosome 19 of jade perch and a few copy numbers on chromosome 1, 3, 14 and 24.

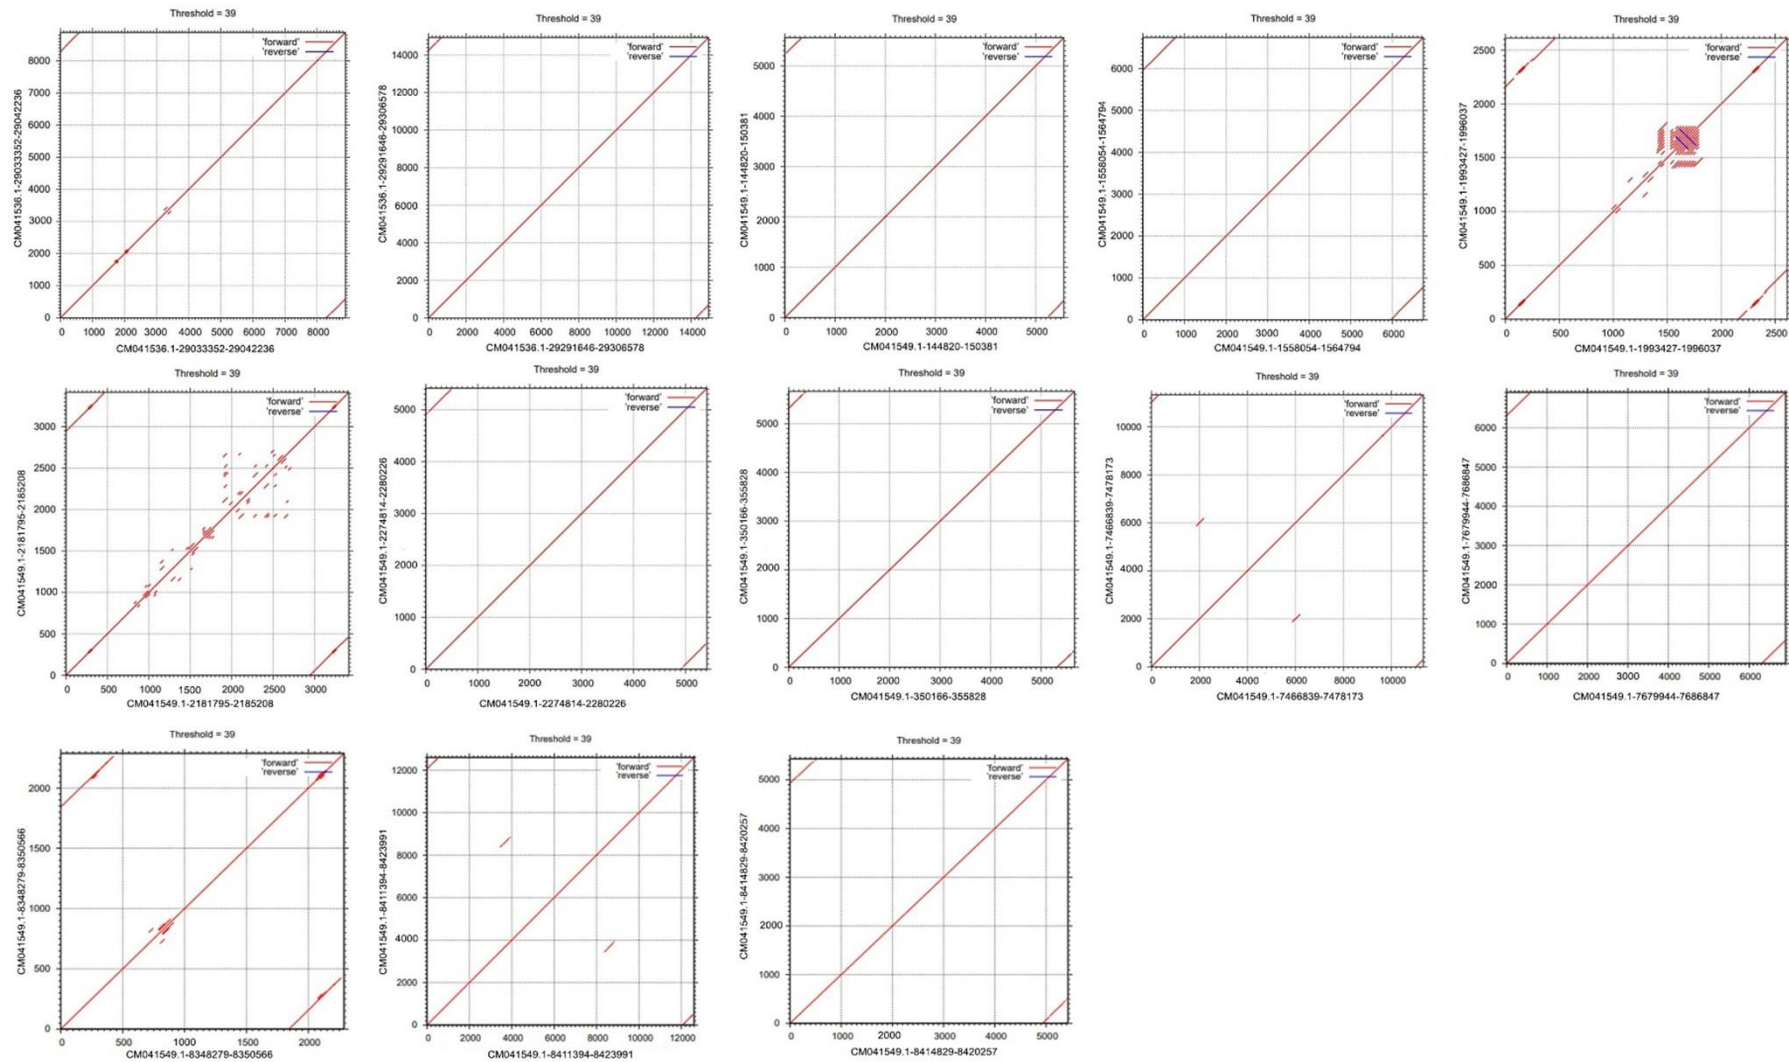

**Figure S2.** Dot matrix analysis showing that only 1 (ID: CM041549.1:1993427–1996037) of the 13 novel repetitive element types was tentatively composed of tandem-arrayed repetitive sequences.

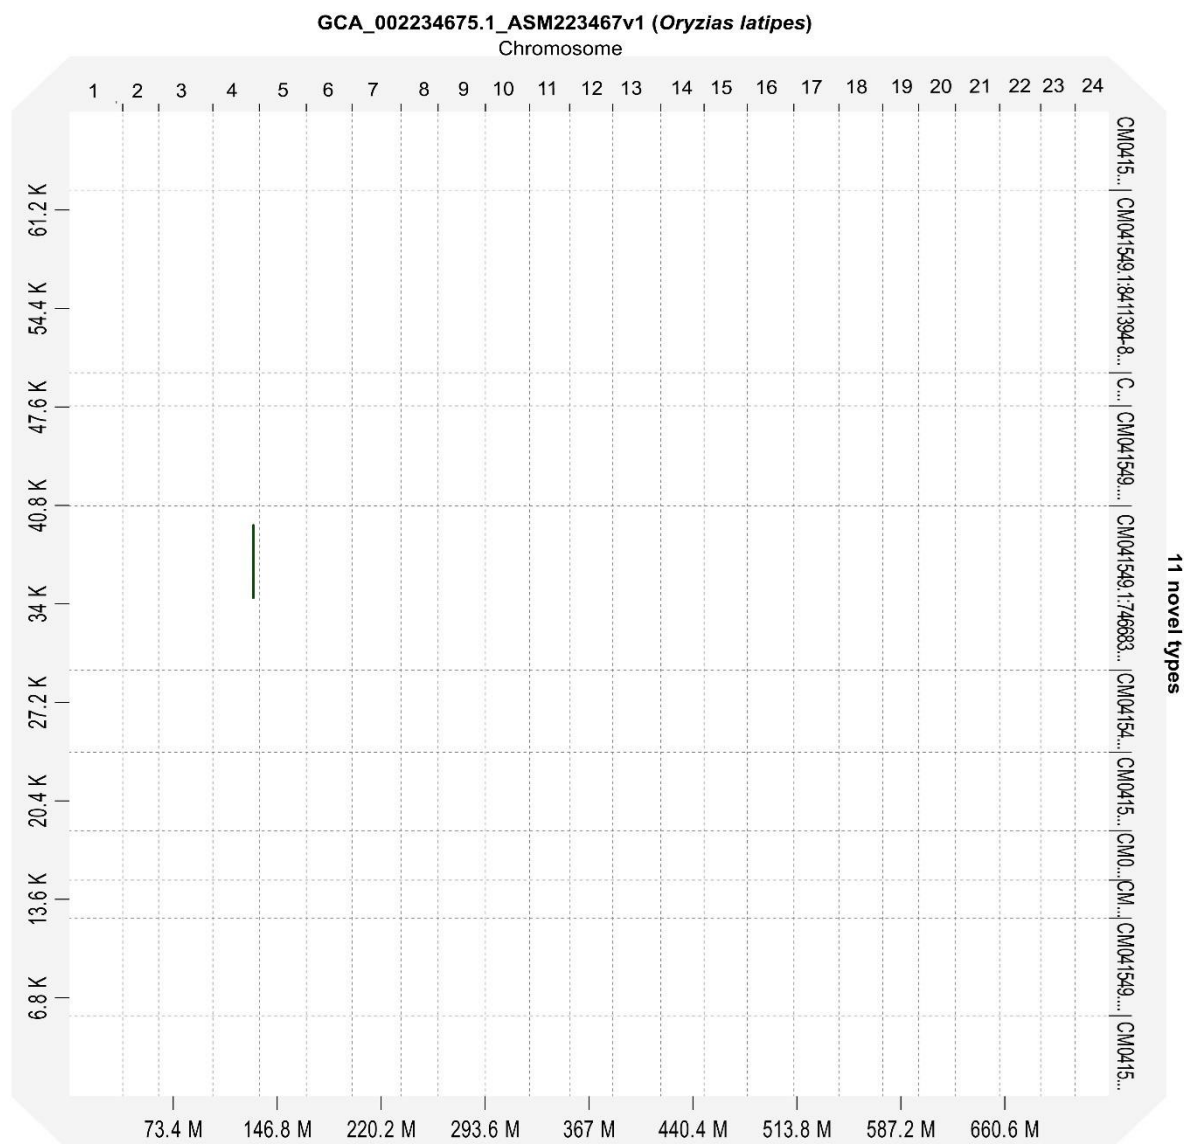

**Figure S3.** The novel repetitive element (ID: CM041549.1:7466839–7478173) from the MLR2 on chromosome 19 of jade perch (*Scortum barcoo* (McCulloch and Waite, 1917)) was distributed in the medaka genome with low copy numbers.

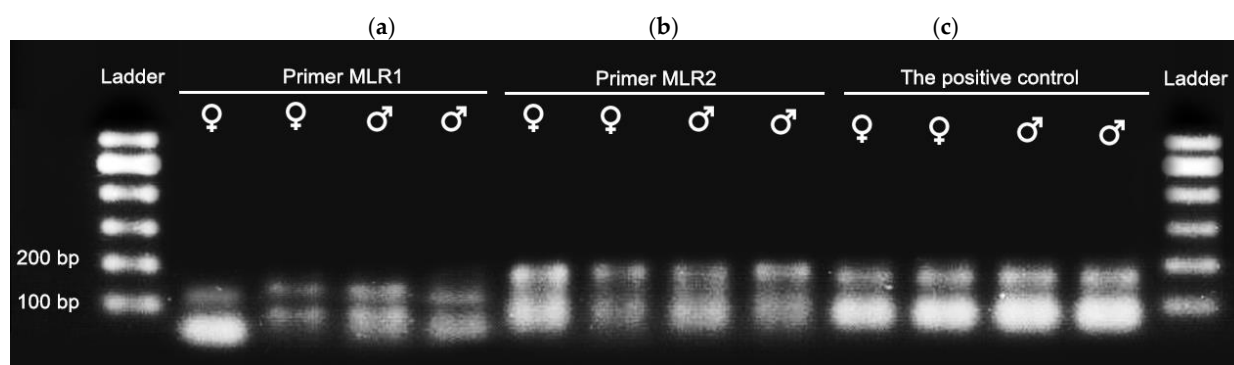

**Figure S4.** Agarose gel electrophoresis of PCR products in the validation test in male and female individuals of jade perch (*Scortum barcoo* (McCulloch and Waite, 1917)). (a) Primer MLR1 (136 bp) (b) Primer MLR2 (138 bp) and (c) The positive control (141 bp).

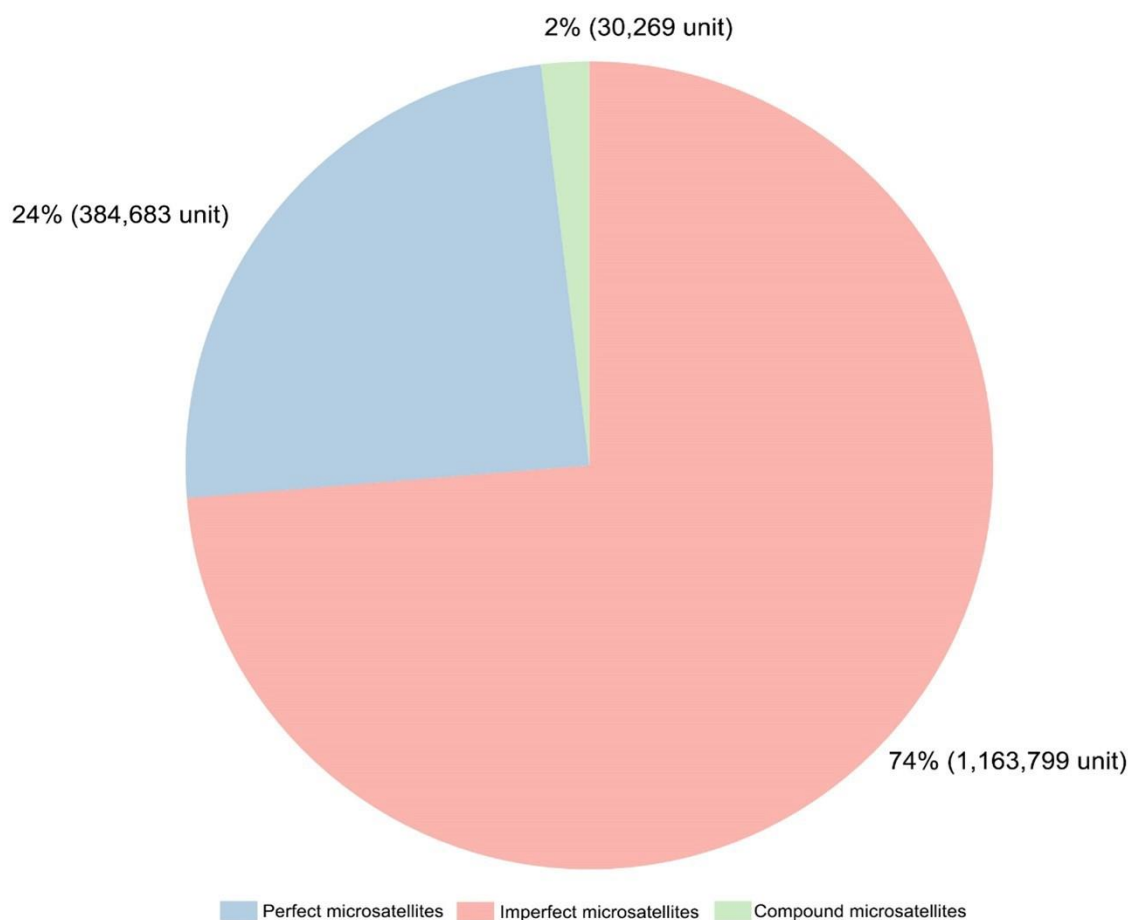

**Figure S5.** Pie diagram showing the portion of each microsatellite type in the jade perch (*Scortum barcoo* (McCulloch and Waite, 1917)).

**Table S1.** List of gonadal genes implicated in sex determination/differentiation of teleosts. [111].

| Gene Name             | Gene Description                                                           |
|-----------------------|----------------------------------------------------------------------------|
| <i>cyp19a1</i>        | Aromatase a (gonad isoform)                                                |
| <i>hsd11b3</i>        | 11 $\beta$ -Hydroxysteroid dehydrogenase type 3                            |
| <i>hsd17b1</i>        | 17 $\beta$ -Hydroxysteroid dehydrogenase type 1                            |
| <i>srd5a2</i>         | 5 $\alpha$ -reductase 2                                                    |
| <i>srd5a3</i>         | 5 $\alpha$ -reductase 3                                                    |
| <i>arb</i>            | Androgen receptor beta                                                     |
| <i>ara/ar</i>         | Androgen receptor/Androgen receptor alpha                                  |
| <i>amh</i>            | Anti-Müllerian hormone or Müllerian-inhibiting substance                   |
| <i>amhr2</i>          | Anti-Müllerian hormone receptor 2                                          |
| <i>ctnnb1</i>         | Catenin (cadherin-associated protein), beta 1                              |
| <i>cyp11a2</i>        | Cytochrome P450, family 11, subfamily A, polypeptide 2/11alpha-hydroxylase |
| <i>cyp11c1/cyp11b</i> | Cytochrome P450, family 11, subfamily C, polypeptide 1/11beta-hydroxylase  |
| <i>cyp26a1</i>        | Cytochrome P450, family 26, subfamily a, polypeptide 1                     |
| <i>ddx11</i>          | DEAD/H box helicase 11                                                     |
| <i>dhh</i>            | Desert hedgehog                                                            |
| <i>dnmt1</i>          | DNA methyltransferase 1                                                    |
| <i>dnmt3aa</i>        | DNA methyltransferase 3aa                                                  |

---

|                     |                                                                                            |
|---------------------|--------------------------------------------------------------------------------------------|
| <i>dnmt3abc1</i>    | DNA methyltransferase 3ab_contig 1                                                         |
| <i>dax1</i>         | Dosage-sensitive sex reversal, adrenal hypoplasia critical region, on chromosome X, gene 1 |
| <i>dmrt3/dmrt3a</i> | Double sex and mab-3 related transcription factor 3(a)                                     |
| <i>dmrt1</i>        | Doublesex- and mab-3-related transcription factor 1                                        |
| <i>dmrt2/dmrt2a</i> | Doublesex- and mab-3-related transcription factor 2(a)                                     |
| <i>esr1/er</i>      | Estrogen receptor                                                                          |
| <i>esr2b/esrrb2</i> | Estrogen receptor 2b                                                                       |
| <i>esrrb</i>        | Estrogen related receptor beta                                                             |
| <i>esrra1</i>       | Estrogen-related receptor alpha                                                            |
| <i>figla</i>        | Factor in the germline alpha                                                               |
| <i>fgf20b</i>       | Fibroblast growth factor 20-like/b                                                         |
| <i>fgf9</i>         | Fibroblast growth factor 9                                                                 |
| <i>fst/fsta</i>     | Follistatin                                                                                |
| <i>fstl5</i>        | Follistatin-like 5                                                                         |
| <i>foxl2</i>        | Forkhead box L2                                                                            |
| <i>gata-4</i>       | Gata-binding protein 4                                                                     |
| <i>nr3c1</i>        | Glucocorticoid receptor                                                                    |
| <i>gsdf</i>         | Gonadal soma derived factor                                                                |
| <i>gdf9</i>         | Growth and differentiation factor 9                                                        |
| <i>ep300a</i>       | Histone acetyltransferase—E1A binding protein 300a                                         |
| <i>kat2b</i>        | Histone acetyltransferase—K(lysine) acetyltransferase 2b                                   |
| <i>hdac10</i>       | Histone deacetylase 10                                                                     |
| <i>hdac11</i>       | Histone deacetylase 11                                                                     |
| <i>hdac2</i>        | Histone deacetylase 2                                                                      |
| <i>hdac7</i>        | Histone deacetylase 7                                                                      |
| <i>hdac8</i>        | Histone deacetylase 8                                                                      |
| <i>lhr</i>          | Luteinizing hormone receptor                                                               |
| <i>lhb</i>          | Luteinizing hormone, beta polypeptide                                                      |
| <i>nr3c2</i>        | Mineralocorticoid receptor                                                                 |
| <i>pdgfaa1</i>      | Platelet-derived growth factor alpha a                                                     |
| <i>pdgfab</i>       | Platelet-derived growth factor alpha b                                                     |
| <i>pdgfb</i>        | Platelet-derived growth factor beta a                                                      |
| <i>pdgfra</i>       | Platelet-derived growth factor receptor, alpha                                             |
| <i>pdgfrb2</i>      | Platelet-derived growth factor receptor, beta 2                                            |
| <i>raraa</i>        | Retinoid acid receptor alpha a                                                             |
| <i>rarab</i>        | Retinoid acid receptor alpha b                                                             |
| <i>rarb</i>         | Retinoid acid receptor beta                                                                |
| <i>sox10</i>        | SRY-related HMG box 10                                                                     |
| <i>sox3</i>         | SRY-related HMG box 3                                                                      |
| <i>sox9</i>         | SRY-related HMG box 9                                                                      |
| <i>srd5a1</i>       | Steroid-5-alpha-reductase, alpha polypeptide 1                                             |
| <i>star-like</i>    | Steroidogenic acute regulatory protein                                                     |
| <i>sf1/ftz-f11</i>  | Steroidogenic factor-1/fushi tarazu factor-1                                               |
| <i>stra6</i>        | Stimulated by retinoic acid gene 6                                                         |
| <i>tdrd1</i>        | Tudor domain containing 1                                                                  |
| <i>tdrd7</i>        | Tudor domain containing 7                                                                  |
| <i>wt1</i>          | Wilms tumor protein 1a                                                                     |
| <i>wt1b</i>         | Wilms tumor protein 1b                                                                     |
| <i>wnt4a</i>        | Wingless-type MMTV integration site family, member 4a                                      |

---



**Table S2.** Summary of perfect, imperfect, and compound microsatellites detected in the genome of jade perch (*Scortum barcoo* (McCulloch and Waite, 1917)) [112].

| Item                                                  | Description                                                 | Perfect<br>Microsatellite | Compound<br>Microsatellite | Imperfect<br>Microsatellite |
|-------------------------------------------------------|-------------------------------------------------------------|---------------------------|----------------------------|-----------------------------|
| Total number of microsatellites                       | Counts                                                      | 384683                    | 30269                      | 1163799                     |
| Total length of microsatellites                       | Bp                                                          | 8420473                   | 2078486                    | 38147048                    |
| The average length of microsatellites                 | Total microsatellite length/total microsatellite count (bp) | 21.89                     | 68.67                      | 32.78                       |
| Microsatellites per sequence                          | Total microsatellite counts/sequence counts                 | 306                       | 24.1                       | 925                         |
| The percentage of sequence covered by microsatellites | Total microsatellite length/total sequence length (%)       | 1.28                      | 0.32                       | 5.80                        |
| Relative abundace                                     | Total microsatellites/total valid length (loci/Mb)          | 584.88                    | 46.02                      | 1769.48                     |
| Relative density                                      | Total microsatellite length/total valid length (bp/Mb)      | 12802.75                  | 3160.19                    | 57999.96                    |

**Table S3.** Details of perfect microsatellites in each chromosome of jade perch (*Scortum barcoo* (McCulloch and Waite, 1917)) [112].

| Chromosome    | Length        | Type          | Mono    | Di       | Tri     | Tetra   | Penta  | Hexa  | Total    |
|---------------|---------------|---------------|---------|----------|---------|---------|--------|-------|----------|
| Chromosome 1  | 34,089,642 bp | Counts        | 4639.00 | 10407.00 | 1689.00 | 1514.00 | 267.00 | 78.00 | 18594.00 |
|               |               | RA* (loci/Mb) | 136.15  | 305.43   | 49.57   | 44.43   | 7.84   | 2.29  | 545.71   |
|               |               | RD** (bp/Mb)  | 2041.67 | 7438.23  | 1022.83 | 1239.92 | 217.47 | 59.87 | 12019.99 |
| Chromosome 2  | 25,388,734 bp | Counts        | 3745.00 | 9685.00  | 2051.00 | 1577.00 | 272.00 | 78.00 | 17408.00 |
|               |               | RA* (loci/Mb) | 147.67  | 381.88   | 80.87   | 62.18   | 10.73  | 3.08  | 686.41   |
|               |               | RD** (bp/Mb)  | 2184.99 | 9402.38  | 1516.25 | 1556.55 | 297.11 | 79.25 | 15036.53 |
| Chromosome 3  | 28,580,765 bp | Counts        | 3925.00 | 7402.00  | 1661.00 | 1382.00 | 245.00 | 78.00 | 14693.00 |
|               |               | RA* (loci/Mb) | 137.44  | 259.19   | 58.16   | 48.39   | 8.58   | 2.73  | 514.49   |
|               |               | RD** (bp/Mb)  | 2038.04 | 6284.11  | 1155.34 | 1232.17 | 227.96 | 67.44 | 11005.06 |
| Chromosome 4  | 26,020,793 bp | Counts        | 4003.00 | 7254.00  | 1252.00 | 1231.00 | 204.00 | 54.00 | 13998.00 |
|               |               | RA* (loci/Mb) | 153.86  | 278.81   | 48.12   | 47.31   | 7.84   | 2.08  | 538.02   |
|               |               | RD** (bp/Mb)  | 2293.97 | 6703.49  | 927.17  | 1259.75 | 211.20 | 57.88 | 11453.46 |
| Chromosome 5  | 29,404,732 bp | Counts        | 4129.00 | 9878.00  | 1484.00 | 1403.00 | 241.00 | 56.00 | 17191.00 |
|               |               | RA* (loci/Mb) | 140.45  | 336.01   | 50.48   | 47.72   | 8.20   | 1.90  | 584.76   |
|               |               | RD** (bp/Mb)  | 2105.20 | 8123.69  | 1001.91 | 1278.87 | 217.87 | 48.78 | 12776.32 |
| Chromosome 6  | 29,333,790 bp | Counts        | 4016.00 | 8390.00  | 1403.00 | 1361.00 | 245.00 | 64.00 | 15479.00 |
|               |               | RA* (loci/Mb) | 136.95  | 286.11   | 47.84   | 46.41   | 8.35   | 2.18  | 527.84   |
|               |               | RD** (bp/Mb)  | 2049.22 | 7212.53  | 967.88  | 1219.04 | 231.72 | 61.18 | 11741.57 |
| Chromosome 7  | 31,353,791 bp | Counts        | 4477.00 | 8920.00  | 1657.00 | 1505.00 | 266.00 | 69.00 | 16894.00 |
|               |               | RA* (loci/Mb) | 142.82  | 284.55   | 52.86   | 48.01   | 8.49   | 2.20  | 538.93   |
|               |               | RD** (bp/Mb)  | 2127.07 | 6912.58  | 1109.74 | 1245.77 | 241.96 | 56.65 | 11693.77 |
| Chromosome 8  | 28,981,091 bp | Counts        | 4086.00 | 9514.00  | 1443.00 | 1382.00 | 299.00 | 60.00 | 16784.00 |
|               |               | RA* (loci/Mb) | 141.01  | 328.34   | 49.80   | 47.69   | 10.32  | 2.07  | 579.23   |
|               |               | RD** (bp/Mb)  | 2099.28 | 8157.69  | 994.75  | 1245.85 | 269.36 | 51.35 | 12818.28 |
| Chromosome 9  | 25,371,961 bp | Counts        | 3854.00 | 7572.00  | 1338.00 | 1303.00 | 186.00 | 50.00 | 14303.00 |
|               |               | RA* (loci/Mb) | 151.94  | 298.53   | 52.75   | 51.37   | 7.33   | 1.97  | 563.89   |
|               |               | RD** (bp/Mb)  | 2273.93 | 7373.15  | 1044.37 | 1300.24 | 189.04 | 49.91 | 12230.64 |
| Chromosome 10 | 21,204,719 bp | Counts        | 3643.00 | 7586.00  | 1094.00 | 975.00  | 182.00 | 48.00 | 13528.00 |
|               |               | RA* (loci/Mb) | 171.85  | 357.84   | 51.61   | 45.99   | 8.59   | 2.26  | 638.14   |
|               |               | RD** (bp/Mb)  | 2580.99 | 8529.56  | 1032.77 | 1122.49 | 247.41 | 56.04 | 13569.26 |

|               |               |               |         |          |         |         |        |        |          |
|---------------|---------------|---------------|---------|----------|---------|---------|--------|--------|----------|
| Chromosome 11 | 14,856,011 bp | Counts        | 2714.00 | 4866.00  | 922.00  | 683.00  | 116.00 | 48.00  | 9349.00  |
|               |               | RA* (loci/Mb) | 182.72  | 327.60   | 62.07   | 45.98   | 7.81   | 3.23   | 629.41   |
|               |               | RD** (bp/Mb)  | 2716.13 | 7860.09  | 1232.44 | 1107.89 | 207.70 | 86.44  | 13210.69 |
| Chromosome 12 | 22,123,342 bp | Counts        | 3435.00 | 7619.00  | 1171.00 | 1017.00 | 167.00 | 47.00  | 13456.00 |
|               |               | RA* (loci/Mb) | 155.29  | 344.44   | 52.94   | 45.98   | 7.55   | 2.12   | 608.32   |
|               |               | RD** (bp/Mb)  | 2318.42 | 8450.06  | 1028.85 | 1163.30 | 212.70 | 57.78  | 13231.11 |
| Chromosome 13 | 25,320,191 bp | Counts        | 3613.00 | 8210.00  | 1401.00 | 1219.00 | 228.00 | 100.00 | 14771.00 |
|               |               | RA* (loci/Mb) | 142.76  | 324.40   | 55.36   | 48.17   | 9.01   | 3.95   | 583.65   |
|               |               | RD** (bp/Mb)  | 2117.26 | 7990.22  | 1111.18 | 1273.74 | 244.58 | 108.82 | 12845.80 |
| Chromosome 14 | 26,191,718 bp | Counts        | 3956.00 | 9425.00  | 1310.00 | 1148.00 | 197.00 | 70.00  | 16106.00 |
|               |               | RA* (loci/Mb) | 151.06  | 359.89   | 50.02   | 43.84   | 7.52   | 2.67   | 615.00   |
|               |               | RD** (bp/Mb)  | 2248.41 | 8840.83  | 993.18  | 1111.01 | 222.42 | 68.50  | 13484.35 |
| Chromosome 15 | 23,334,781 bp | Counts        | 3717.00 | 7032.00  | 1295.00 | 1133.00 | 179.00 | 39.00  | 13395.00 |
|               |               | RA* (loci/Mb) | 159.32  | 301.40   | 55.51   | 48.56   | 7.67   | 1.67   | 574.13   |
|               |               | RD** (bp/Mb)  | 2386.59 | 7265.34  | 1083.46 | 1261.68 | 199.74 | 42.95  | 12239.76 |
| Chromosome 16 | 28,737,736 bp | Counts        | 4052.00 | 9540.00  | 1741.00 | 1320.00 | 211.00 | 54.00  | 16918.00 |
|               |               | RA* (loci/Mb) | 141.04  | 332.05   | 60.60   | 45.94   | 7.34   | 1.88   | 588.85   |
|               |               | RD** (bp/Mb)  | 2082.72 | 8133.94  | 1249.38 | 1219.62 | 207.97 | 50.96  | 12944.59 |
| Chromosome 17 | 26,059,279 bp | Counts        | 3796.00 | 8267.00  | 1527.00 | 1203.00 | 232.00 | 62.00  | 15087.00 |
|               |               | RA* (loci/Mb) | 145.78  | 317.48   | 58.64   | 46.20   | 8.91   | 2.38   | 579.39   |
|               |               | RD** (bp/Mb)  | 2168.53 | 7750.60  | 1224.78 | 1243.79 | 257.49 | 60.37  | 12705.56 |
| Chromosome 18 | 26,786,799 bp | Counts        | 3880.00 | 8516.00  | 1639.00 | 1297.00 | 257.00 | 56.00  | 15645.00 |
|               |               | RA* (loci/Mb) | 144.96  | 318.17   | 61.24   | 48.46   | 9.60   | 2.09   | 584.52   |
|               |               | RD** (bp/Mb)  | 2171.43 | 7777.98  | 1235.52 | 1191.09 | 265.64 | 54.47  | 12696.13 |
| Chromosome 19 | 28,821,003 bp | Counts        | 4257.00 | 11169.00 | 1668.00 | 1662.00 | 383.00 | 87.00  | 19226.00 |
|               |               | RA* (loci/Mb) | 147.79  | 387.75   | 57.91   | 57.70   | 13.30  | 3.02   | 667.47   |
|               |               | RD** (bp/Mb)  | 2202.46 | 9533.55  | 1196.46 | 1457.52 | 340.91 | 82.28  | 14813.18 |
| Chromosome 20 | 26,975,690 bp | Counts        | 3737.00 | 8478.00  | 1454.00 | 1229.00 | 248.00 | 54.00  | 15200.00 |
|               |               | RA* (loci/Mb) | 138.58  | 314.39   | 53.92   | 45.58   | 9.20   | 2.00   | 563.67   |
|               |               | RD** (bp/Mb)  | 2059.36 | 7714.25  | 1094.48 | 1246.60 | 258.29 | 53.62  | 12426.60 |
| Chromosome 21 | 23,337,218 bp | Counts        | 3693.00 | 7754.00  | 1247.00 | 1186.00 | 231.00 | 44.00  | 14155.00 |
|               |               | RA* (loci/Mb) | 158.28  | 332.32   | 53.44   | 50.83   | 9.90   | 1.89   | 606.66   |
|               |               | RD** (bp/Mb)  | 2349.83 | 8075.18  | 1071.16 | 1242.20 | 257.15 | 49.37  | 13044.89 |
| Chromosome 22 | 30,119,946 bp | Counts        | 4216.00 | 9784.00  | 1352.00 | 1500.00 | 232.00 | 75.00  | 17159.00 |
|               |               | RA* (loci/Mb) | 140.00  | 324.90   | 44.90   | 49.81   | 7.70   | 2.49   | 569.80   |
|               |               | RD** (bp/Mb)  | 2100.12 | 7985.60  | 899.10  | 1352.49 | 227.14 | 66.75  | 12631.20 |
| Chromosome 23 | 31,126,834 bp | Counts        | 4180.00 | 11016.00 | 1877.00 | 1514.00 | 272.00 | 68.00  | 18927.00 |
|               |               | RA* (loci/Mb) | 134.31  | 353.97   | 60.31   | 48.65   | 8.74   | 2.18   | 608.16   |
|               |               | RD** (bp/Mb)  | 1996.64 | 8668.52  | 1202.74 | 1271.54 | 249.99 | 56.87  | 13446.30 |
| Chromosome 24 | 29,328,985 bp | Counts        | 4084.00 | 8535.00  | 1537.00 | 1336.00 | 202.00 | 45.00  | 15739.00 |
|               |               | RA* (loci/Mb) | 139.32  | 291.17   | 52.43   | 45.58   | 6.89   | 1.54   | 536.93   |
|               |               | RD** (bp/Mb)  | 2086.89 | 7120.80  | 1032.34 | 1249.69 | 186.61 | 39.50  | 11715.83 |

Note: Relative abundance (RA\*), Relative density (RD\*\*).

## References

111. Tsakogiannis, A.; Manousaki, T.; Lagnel, J.; Sterioti, A.; Pavlidis, M.; Papandroulakis, N.; Mylonas, C.C.; Tsigenopoulos, C.S. The transcriptomic signature of different sexes in two protogynous hermaphrodites: Insights into the molecular network underlying sex phenotype in fish. *Sci. Rep.* **2018**, *8*, 3564. <https://doi.org/10.1038/s41598-018-21992-9>.
112. McCulloch, A.R.; Waite, E.R. Results of the South Australian Museum expedition to strzelecki and cooper creeks. September and October, 1916. (k) Pisces. *Trans. R. Soc. S. Aust.* **1917**, *41*, 472–475.
